# Supplementary material for: Aspergillus fumigatus MADS-Box Transcription Factor rlmA Is Required for Regulation of the Cell Wall Integrity and Virulence
Source: PubMed Central journal article supplement (PMC5015955; doi:10.1534/g3.116.031112), 2016-07-28
Supplement: supp_g3.116.031112_FigureS2.pdf [file supp_g3.116.031112_FigureS2.pdf]

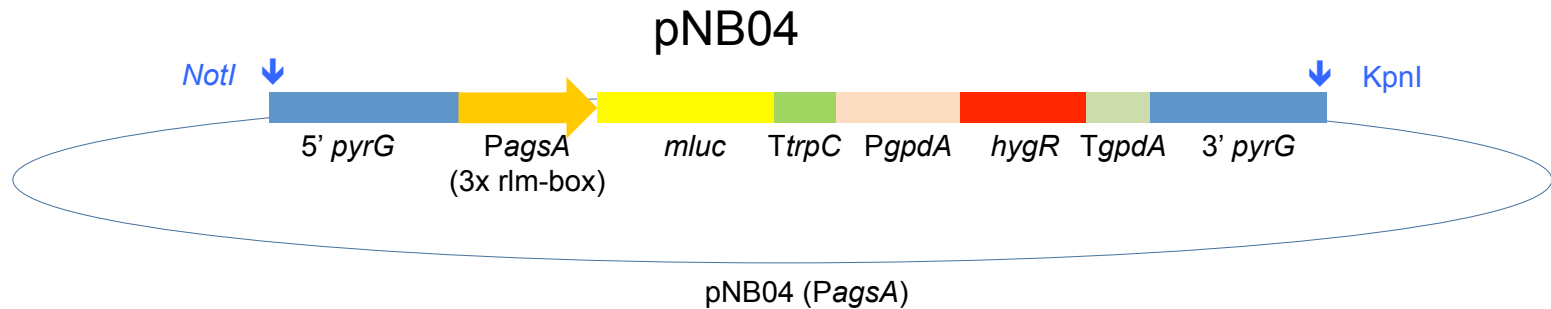

**Figure S2** Construction of the *PagsA::mulc* cassette. The plasmid pNB04 contains the sequence of *A. niger agsA* promoter region including 3x rlm recognition domain cloned downstream the luciferase (*mluc*) reporter gene. Hygromycin resistance gene was used as dominant marker and is surrounded by the *A. nidulans gpdA* promoter and termination region. The plasmid contains the 5' and 3' end of *A. fumigatus pyrG* gene to drive homologous integration at the *pyrG* locus. The details on the construction of the plasmid will be published elsewhere.
