# Supplementary material for: Aspergillus fumigatus MADS-Box Transcription Factor rlmA Is Required for Regulation of the Cell Wall Integrity and Virulence
Source: PubMed Central journal article supplement (PMC5015955; doi:10.1534/g3.116.031112), 2016-07-28
Supplement: supp_g3.116.031112_FigureS4.pdf [file supp_g3.116.031112_FigureS4.pdf]

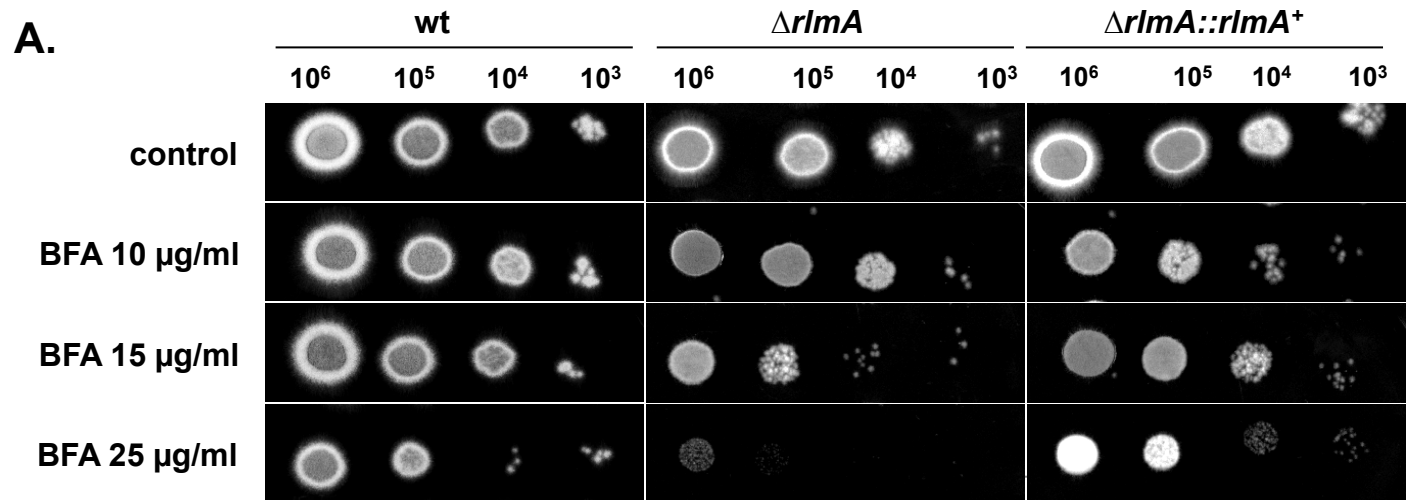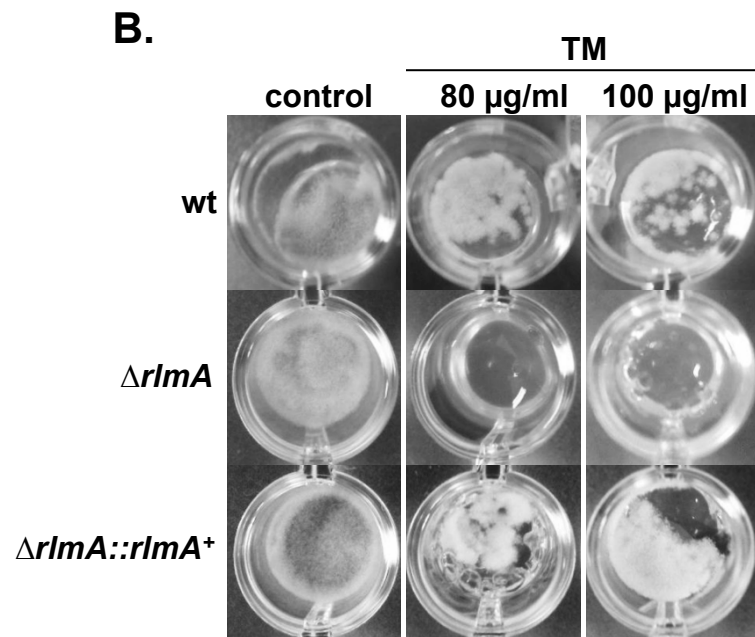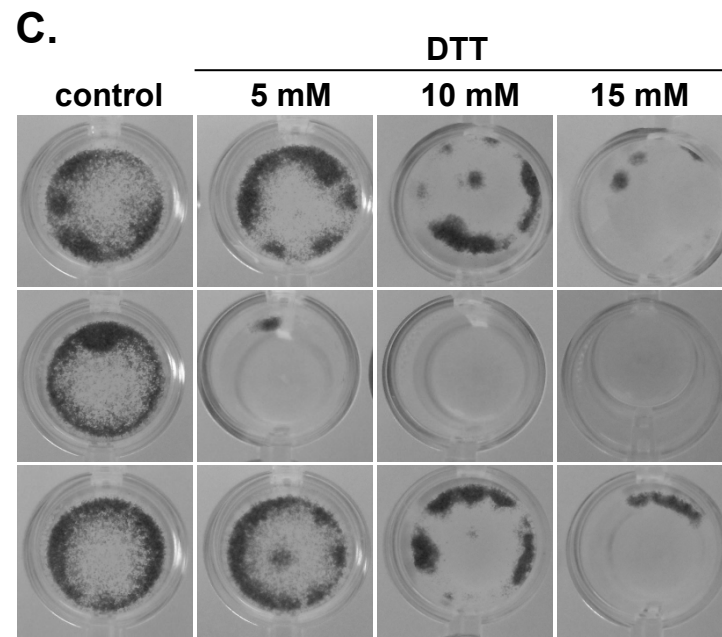

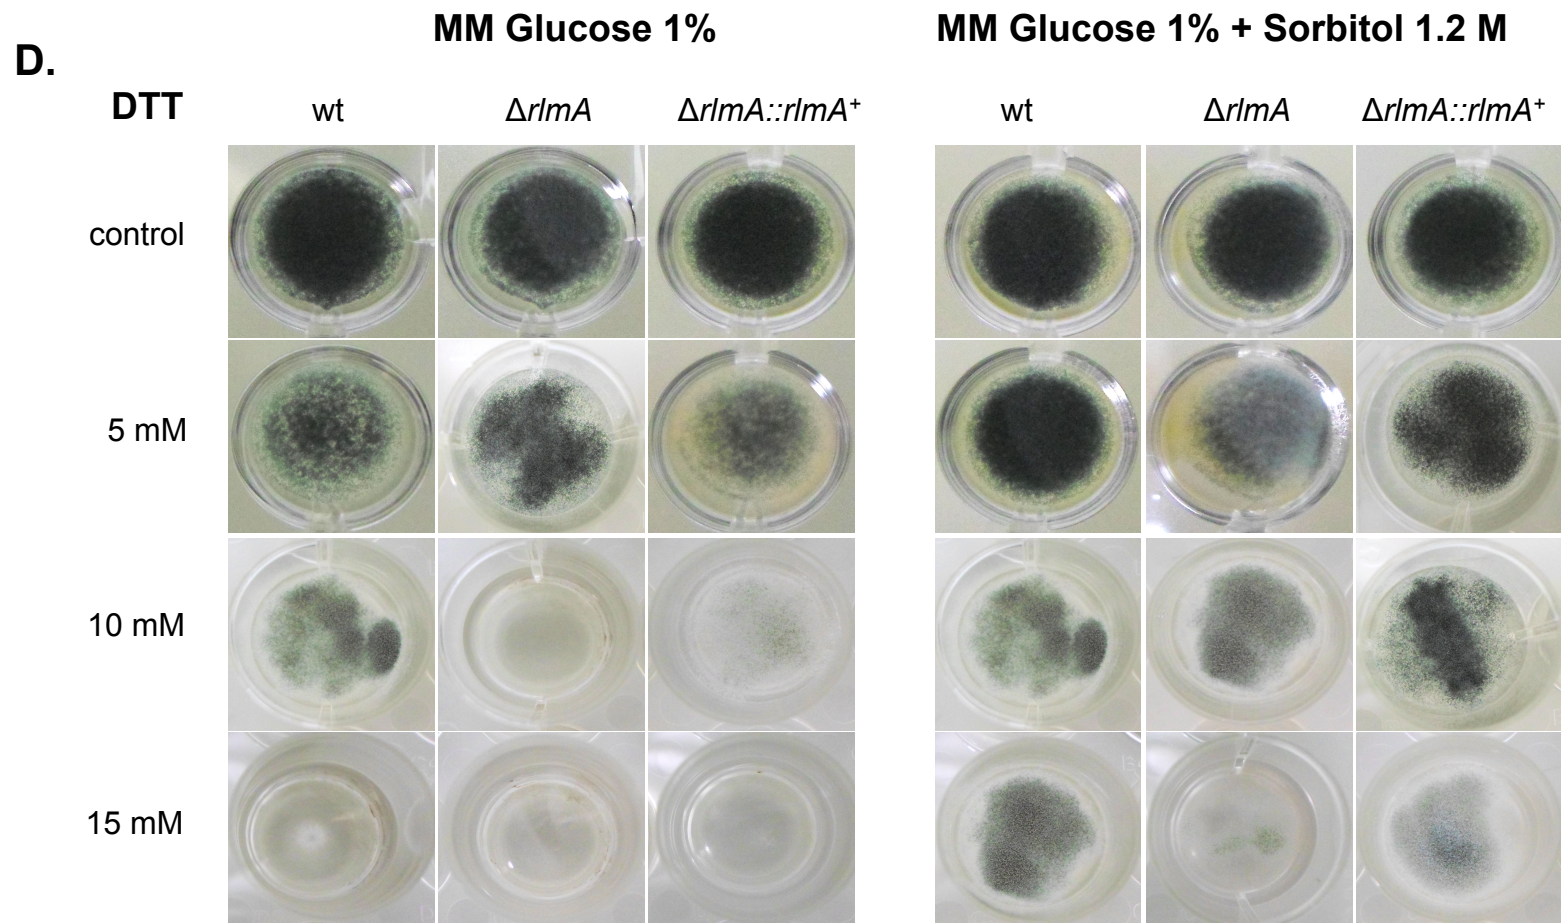

**Figure S4** The *A. fumigatus*  $\Delta rlmA$  strain is more sensitive to endoplasmic reticulum (ER)-stressors. The indicated number of conidia from the *A. fumigatus* wild-type,  $\Delta rlmA$  and  $\Delta rlmA::rlmA^+$  strains were spotted on solid YG medium supplemented with brefeldin A (BFA) or into a 24-well plate ( $1 \times 10^4$  conidia/well) containing the indicated concentration of tunicamycin (TM) and incubated at 37°C for 72 hours (A-B).  $1 \times 10^4$  conidia/well were inoculated on liquid YG containing the indicated concentration or dithiothreitol (DTT) and incubated at 37°C for 48 hours (C). DTT sensitivity of the  $\Delta rlmA$  mutant strain can be rescued by adding D-sorbitol.  $1 \times 10^4$  conidia from the wild-type,  $\Delta rlmA$  and  $\Delta rlmA::rlmA^+$  complemented strain were inoculated into 1 ml of liquid MM in a 24-well plate with or without 1.2 M of sorbitol supplemented with different DTT concentrations. The plates were incubated for 72 hours and photographed (D).
