# Supplementary material for: Aspergillus fumigatus MADS-Box Transcription Factor rlmA Is Required for Regulation of the Cell Wall Integrity and Virulence
Source: PubMed Central journal article supplement (PMC5015955; doi:10.1534/g3.116.031112), 2016-07-28
Supplement: supp_g3.116.031112_FigureS5.pdf [file supp_g3.116.031112_FigureS5.pdf]

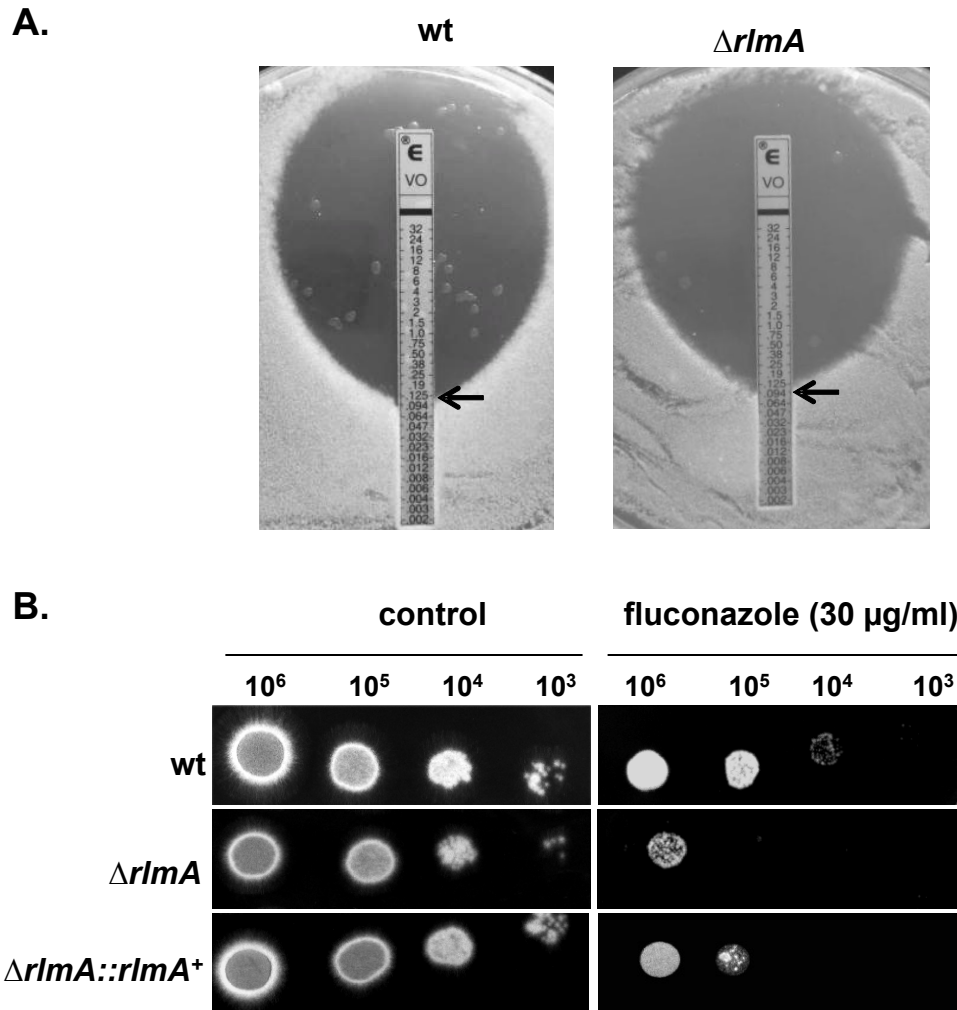

**Figure S5** The  $\Delta rlmA$  mutant has increased sensitivity to the antifungal triazole drugs. (A) The antifungal susceptibility according to E-test gradient strips for voriconazole. Endpoints 0.125 (wild-type) and 0.094 ( $\Delta rlmA$ ). (B) The indicated numbers of conidia were inoculated onto solid YG plates that were supplemented with fluconazole. The plates were incubated for 48 hours at 37°C.
