# Supplementary material for: Aspergillus fumigatus MADS-Box Transcription Factor rlmA Is Required for Regulation of the Cell Wall Integrity and Virulence
Source: PubMed Central journal article supplement (PMC5015955; doi:10.1534/g3.116.031112), 2016-07-28
Supplement: supp_g3.116.031112_FigureS6.pdf [file supp_g3.116.031112_FigureS6.pdf]

**A.**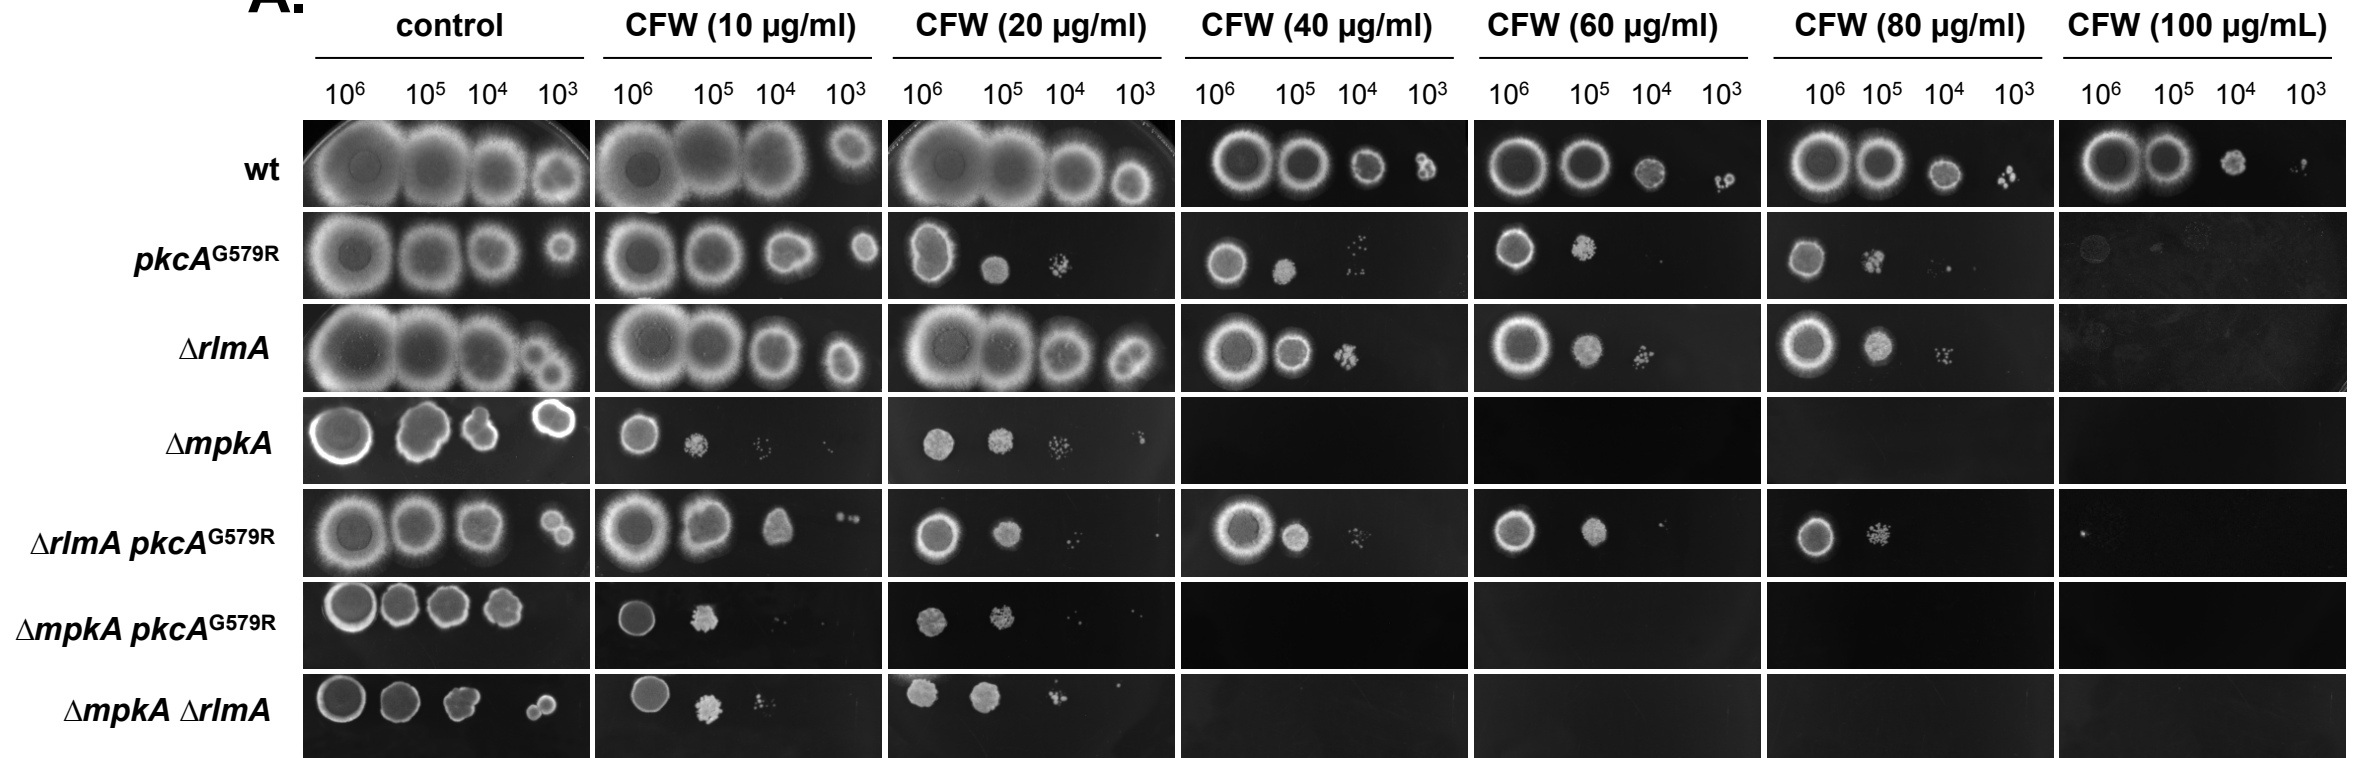

**B.**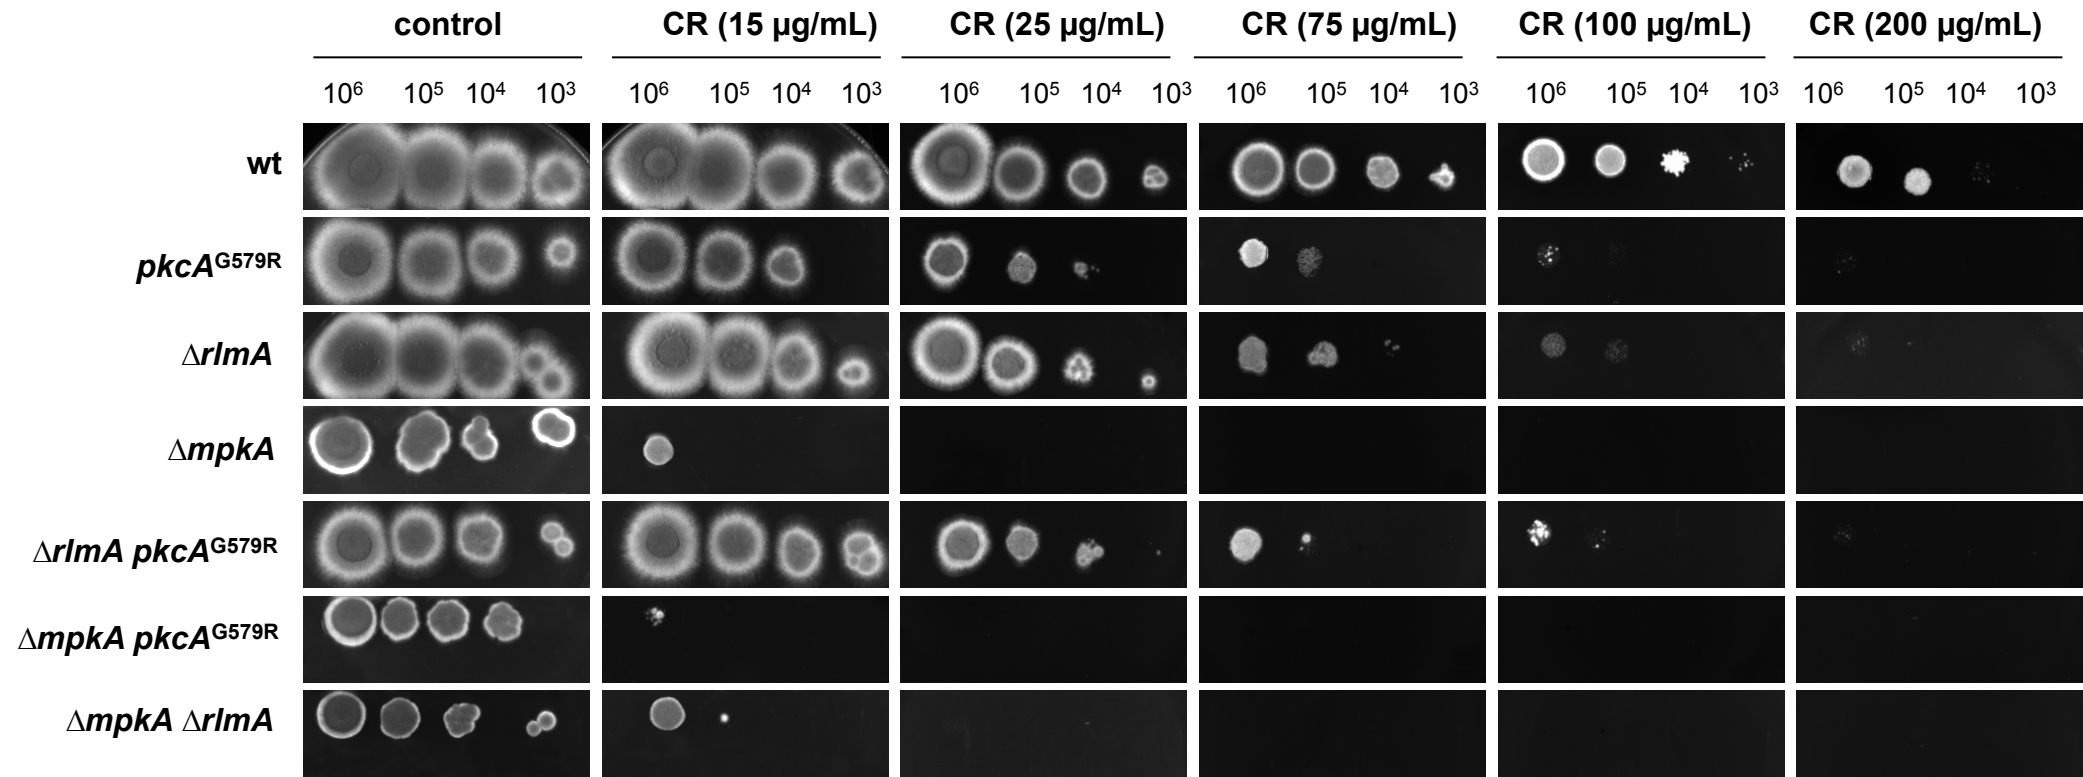

**C.**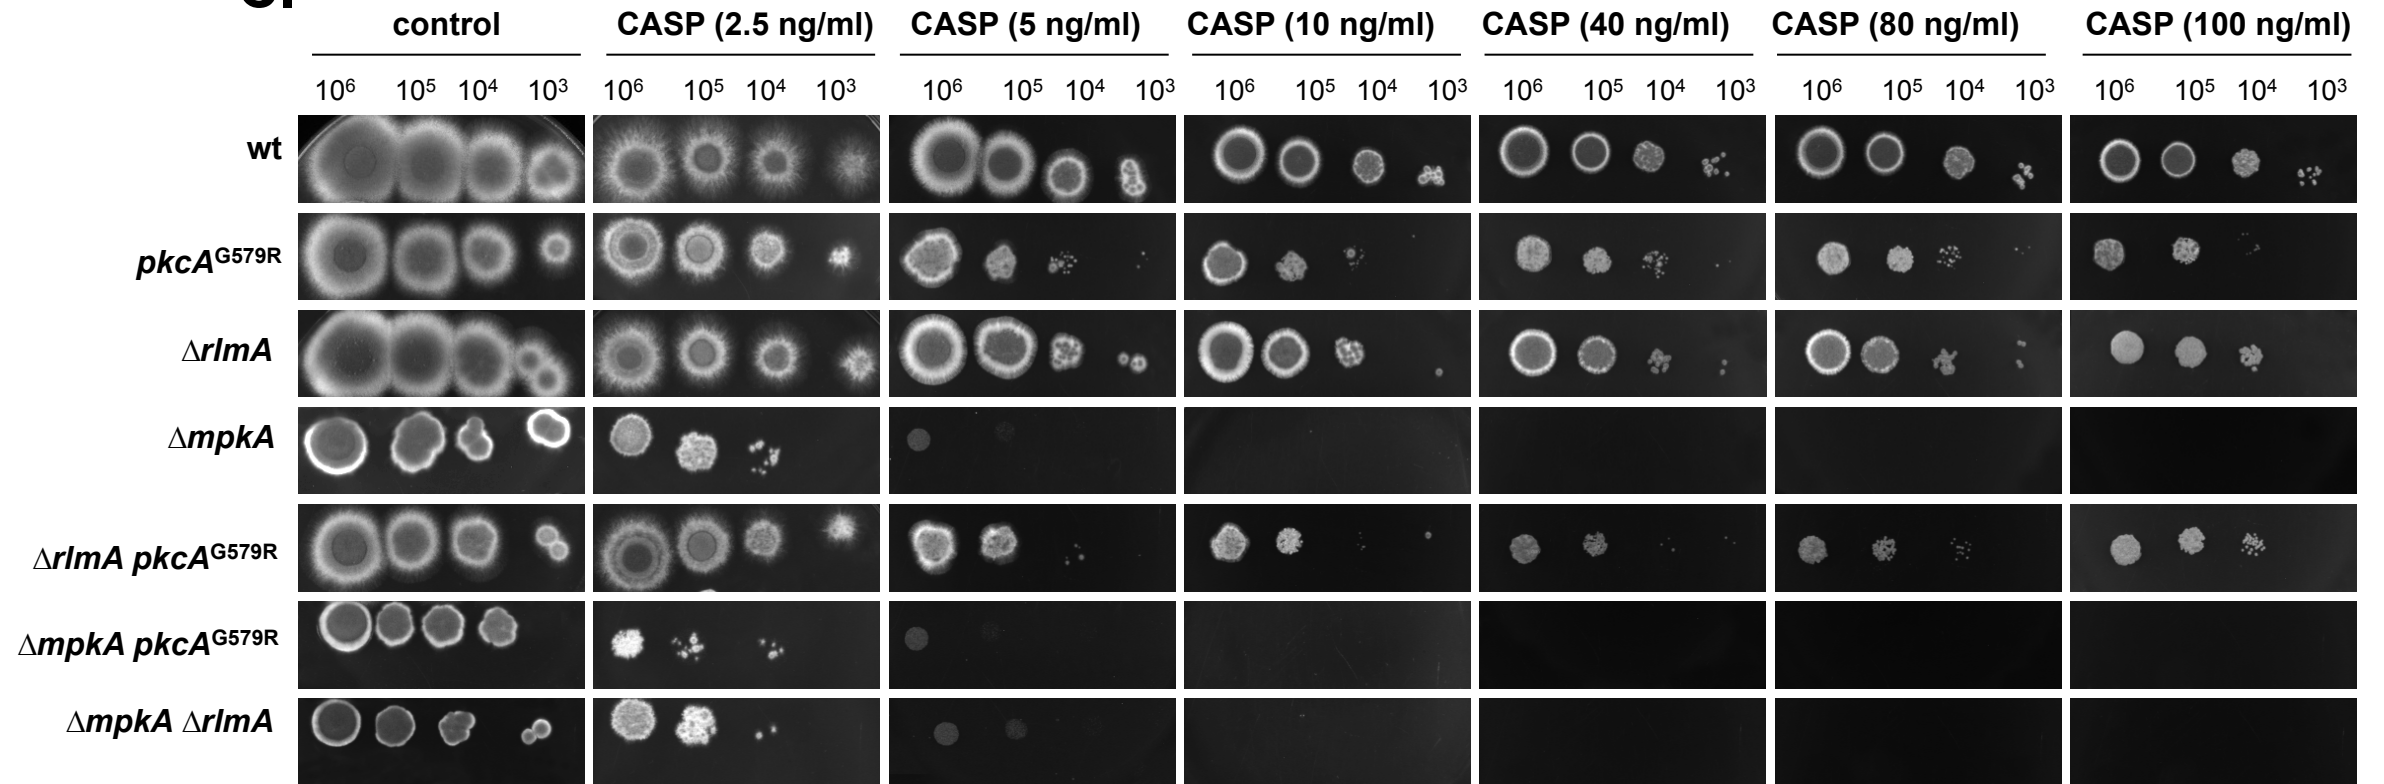

**D.**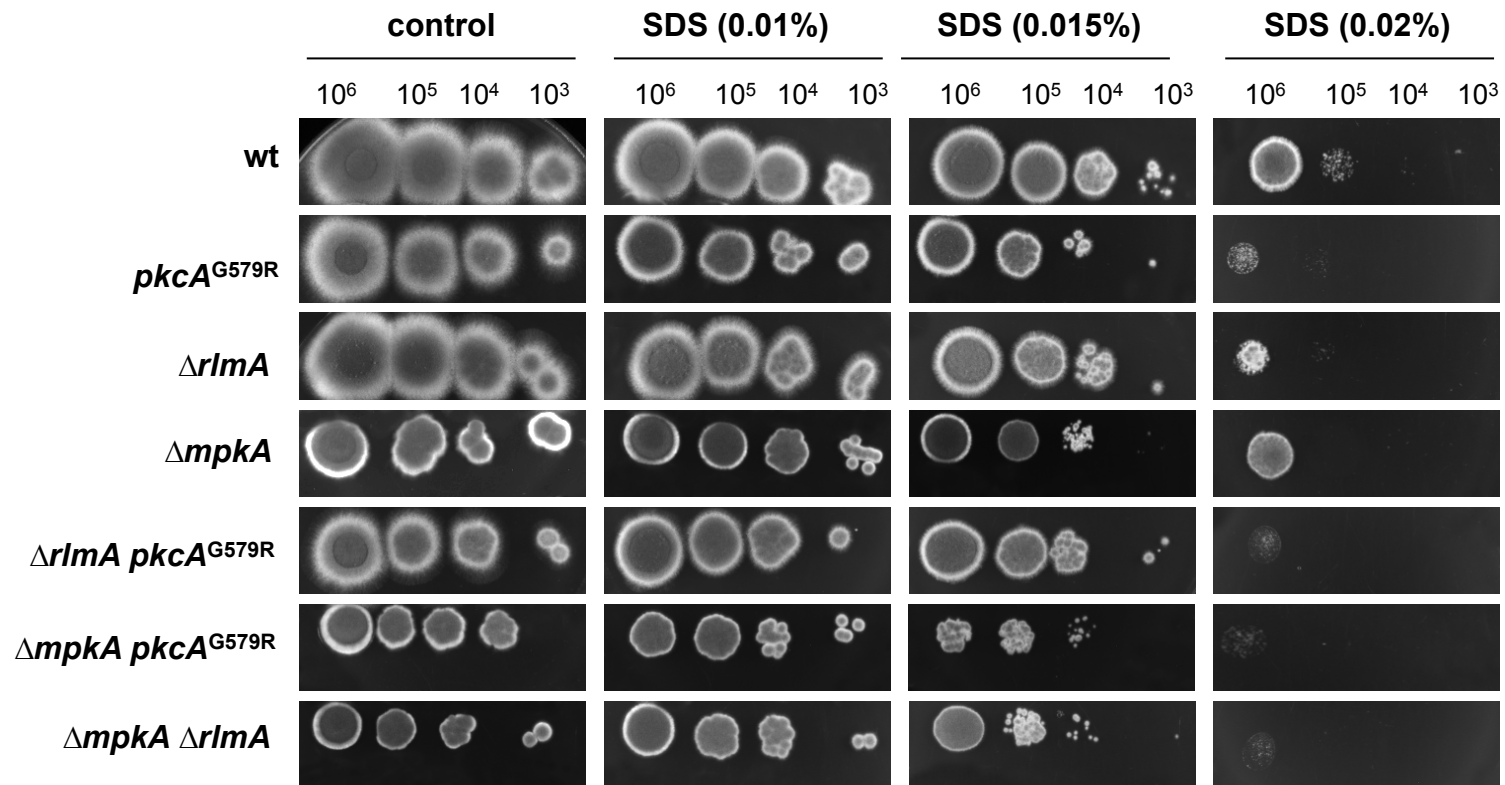

**Figure S6** Genetic analysis of the CWI pathway single and double mutants. (A-D) *rlmA*, *pkcA* and *mpkA* interact genetically during cell wall stress in the presence of CFW, CR, caspofungin and SDS.
