# Supplementary material for: Aspergillus fumigatus MADS-Box Transcription Factor rlmA Is Required for Regulation of the Cell Wall Integrity and Virulence
Source: PubMed Central journal article supplement (PMC5015955; doi:10.1534/g3.116.031112), 2016-07-28
Supplement: supp_g3.116.031112_FigureS7.pdf [file supp_g3.116.031112_FigureS7.pdf]

A.

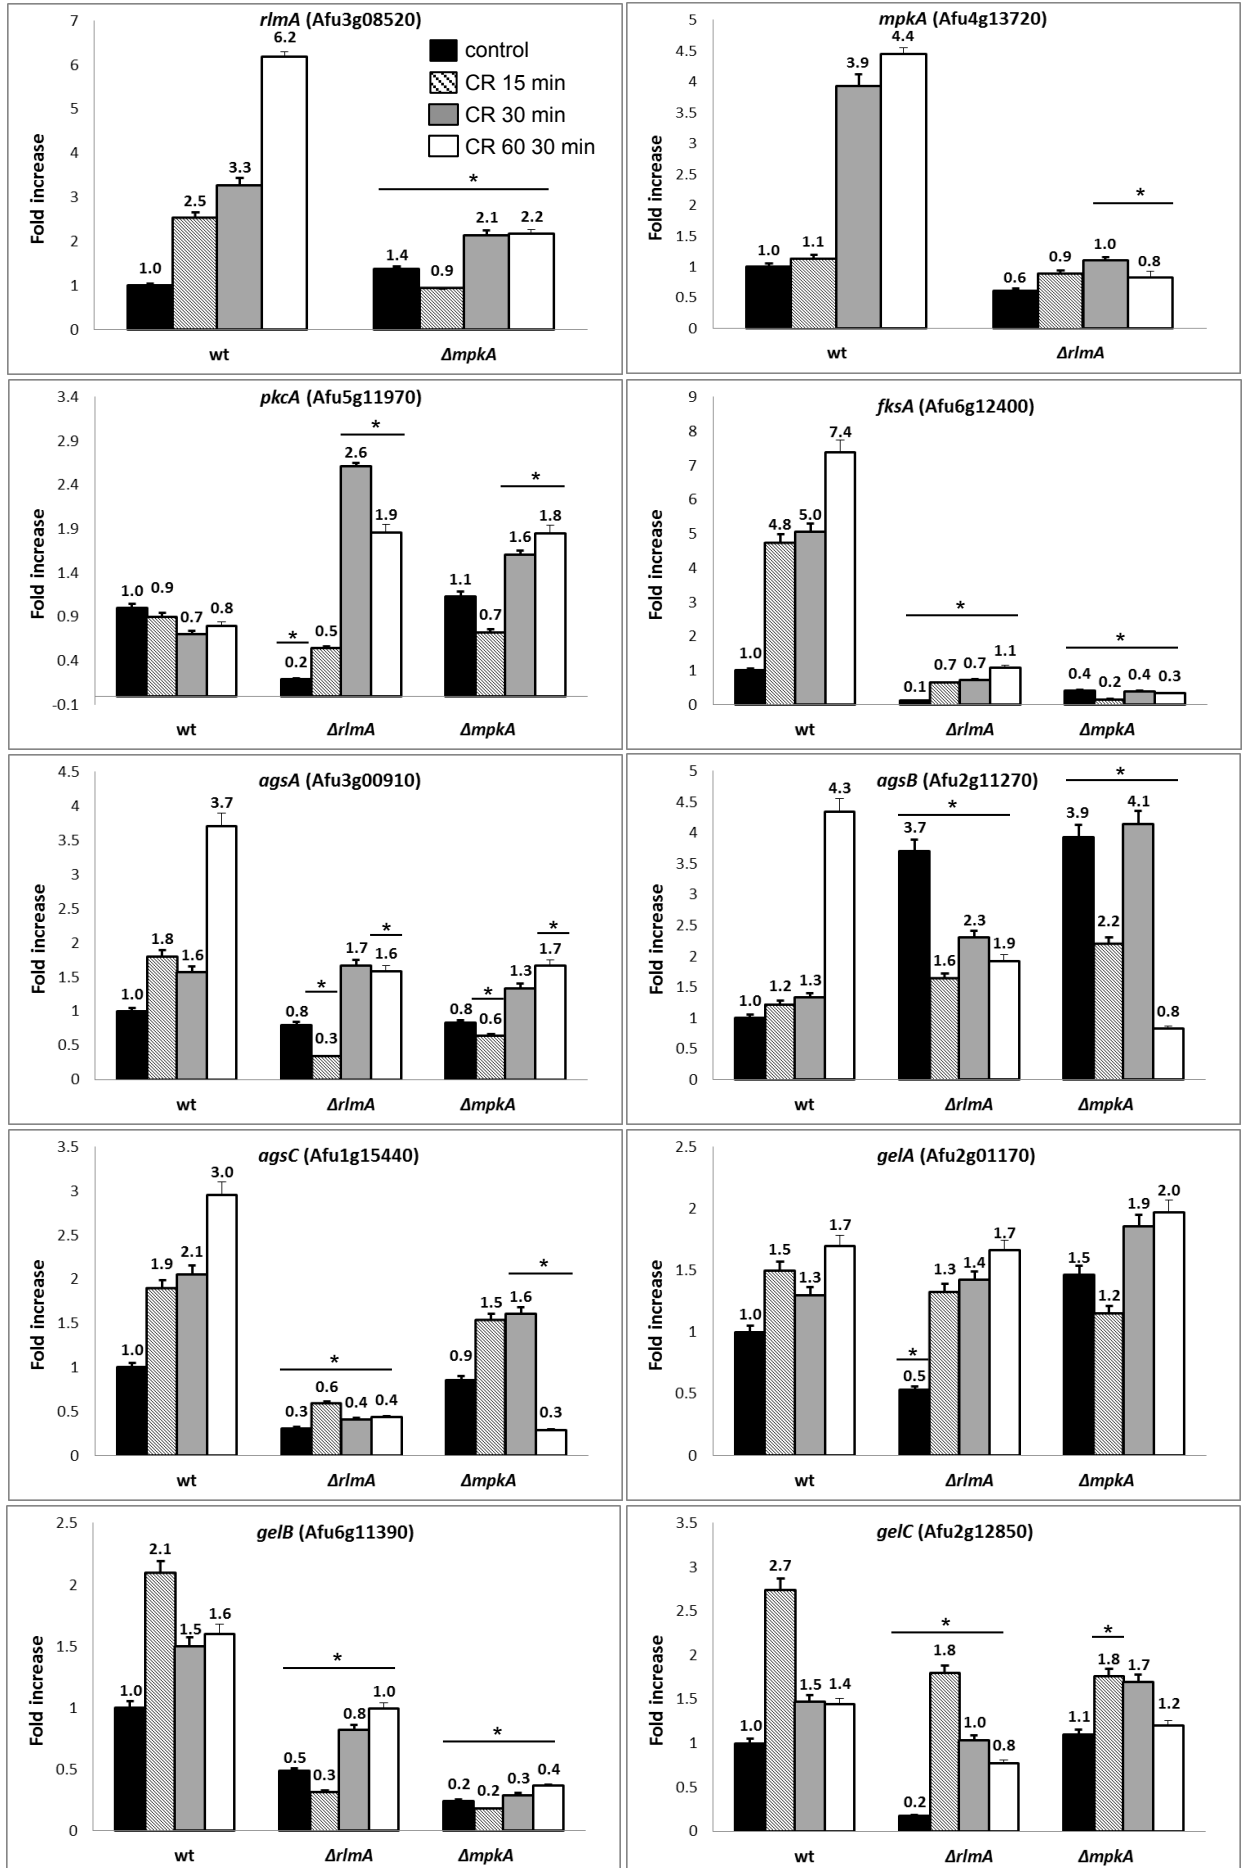

B.

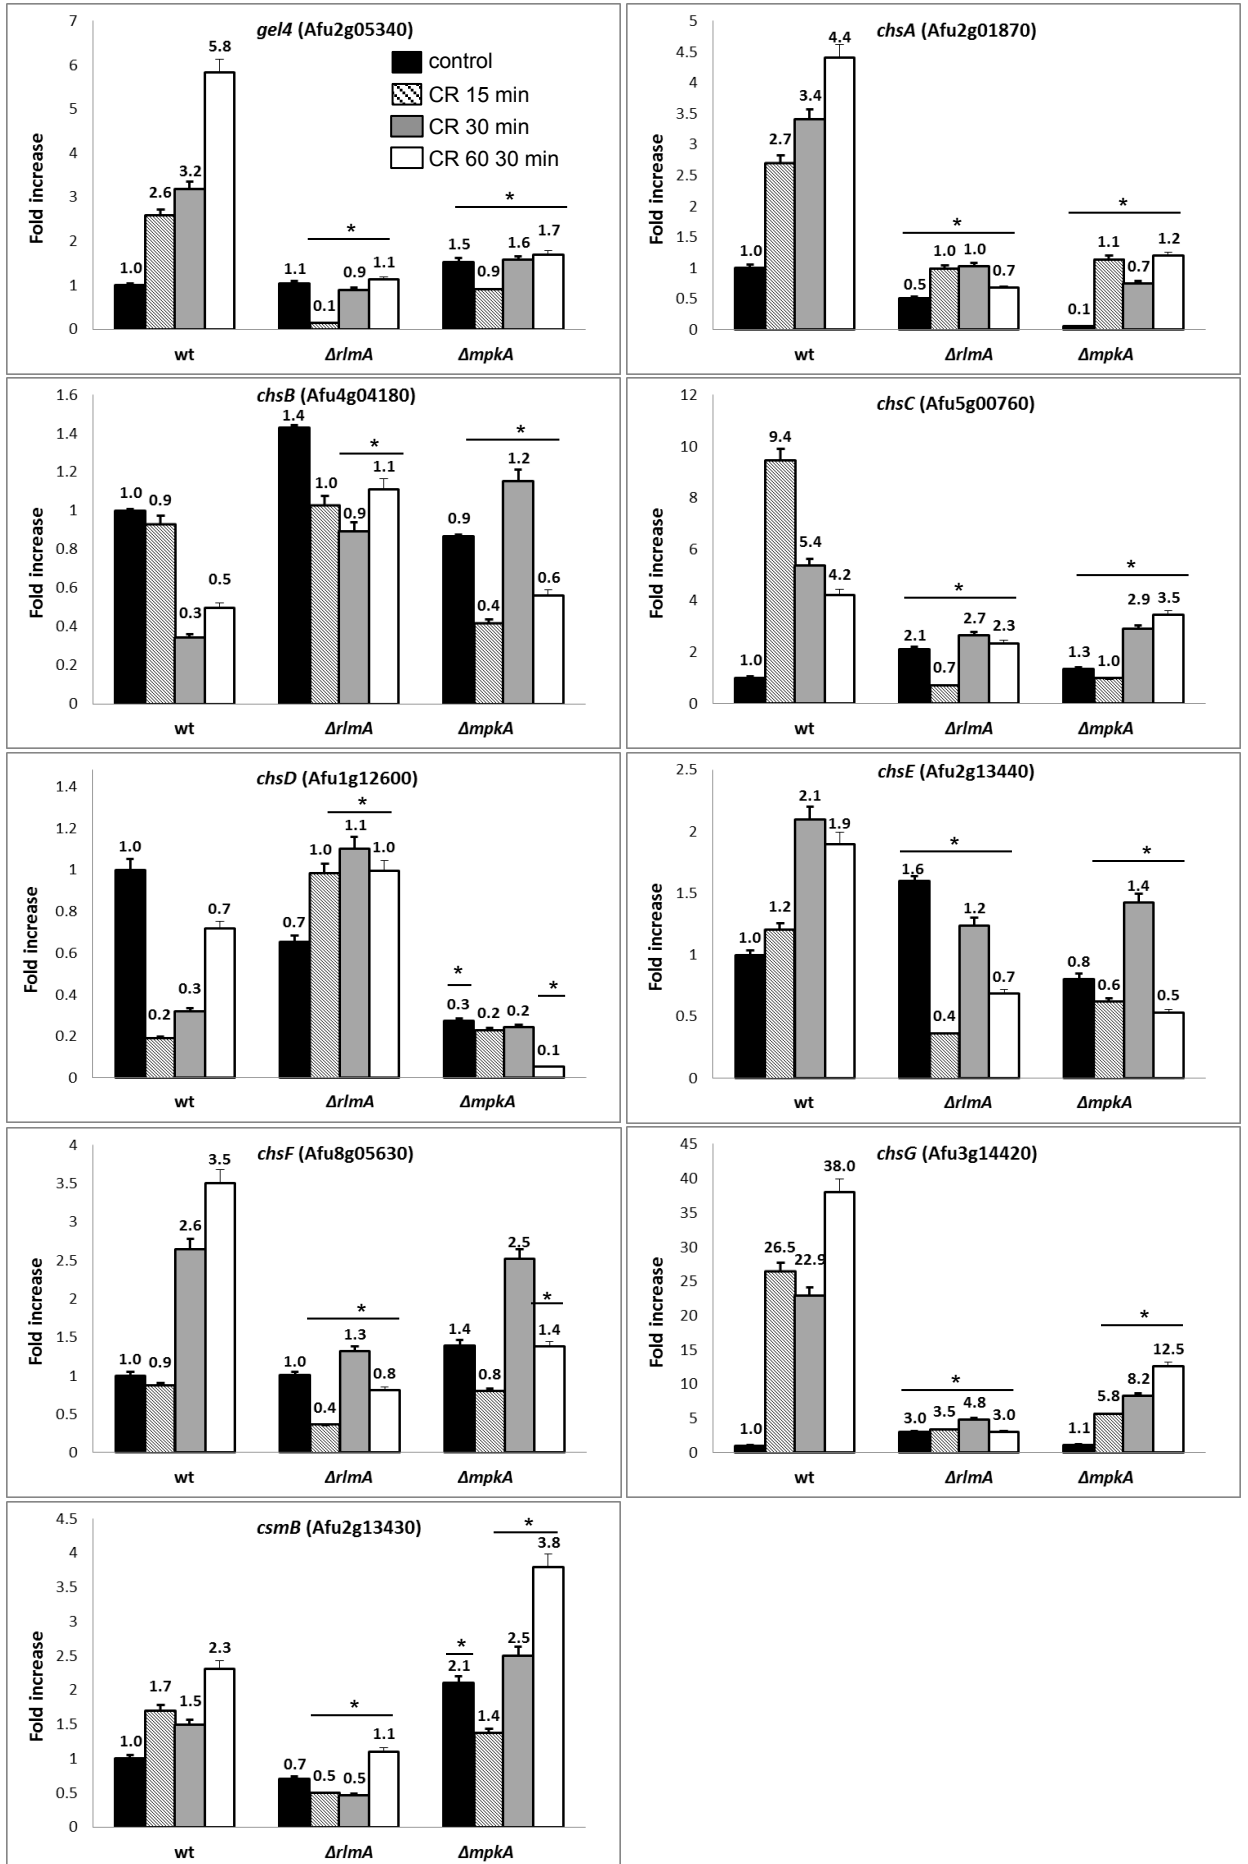

**Figure S7** Analysis of the transcriptional responses of wild-type,  $\Delta rlmA$  and  $\Delta mpkA$  mutant strains to CR-induced cell wall stress. The wild-type,  $\Delta rlmA$  and  $\Delta mpkA$  strains were grown in liquid MM medium. After incubation, CR was added and the cultures were grown for an additional 15, 30 and 60 min. The mRNA abundance for each gene was assessed by qRT-PCR and normalized to  $\beta$ -tubulin (A-B). The fold increase in each strain represents the normalized mRNA abundance relative to the wild-type strain at time point 0 (i.e., prior to CR exposure). The data represent the average value of at least three biological replicates, each of which was repeated in duplicate in the same run, Bar = SD, \*  $p \leq 0.05$  (One Way ANOVA).
