# Supplementary material for: Aspergillus fumigatus MADS-Box Transcription Factor rlmA Is Required for Regulation of the Cell Wall Integrity and Virulence
Source: PubMed Central journal article supplement (PMC5015955; doi:10.1534/g3.116.031112), 2016-07-28
Supplement: supp_g3.116.031112_TableS1.pdf [file supp_g3.116.031112_TableS1.pdf]

**Supplemental Table 1: *A. fumigatus* strains used in this study.**

| Name                                         | Genotype                                                    | Reference                              |
|----------------------------------------------|-------------------------------------------------------------|----------------------------------------|
| <i>akuB</i> <sup>KU80</sup>                  | $\DeltaakuB$ ; <i>pyrG</i> -                                | da Silva Ferreira <i>et al.</i> , 2006 |
| $\Delta rlmA$                                | $\Delta rlmA::pyrG$ ; $\DeltaakuB$                          | This study                             |
| $\Delta rlmA::rlmA^+$                        | $\Delta rlmA::rlmA^+$ ; $\DeltaakuB$                        | This study                             |
| $\Delta rlmA$ <i>pyrG</i> -                  | $\Delta rlmA$ ; $\DeltaakuB$                                | This study                             |
| <i>rlmA::gfp</i>                             | <i>rlmA::gfp</i> ; $\DeltaakuB$                             | This study                             |
| <i>pkcA</i> <sup>G579R</sup>                 | <i>pkcA</i> <sup>G579R</sup> :: <i>pyrG</i> ; $\DeltaakuB$  | Rocha <i>et al.</i> , 2015             |
| $\Delta mpkA$                                | $\Delta mpkA$ ; $\DeltaakuB$                                | Valiante <i>et al.</i> , 2009          |
| $\Delta rlmA$ ; <i>pkcA</i> <sup>G579R</sup> | $\Delta rlmA$ ; <i>pkcA</i> <sup>G579R</sup> ; $\DeltaakuB$ | This study                             |
| $\Delta rlmA$ ; $\Delta mpkA$                | $\Delta rlmA$ ; $\Delta mpkA$ ; $\DeltaakuB$                | This study                             |
| <i>pkcA</i> <sup>G579R</sup> ; $\Delta mpkA$ | <i>pkcA</i> <sup>G579R</sup> ; $\Delta mpkA$                | This study                             |
| MAF 6.6                                      | <i>PagsA::mluc</i> ; $\DeltaakuB$                           | This study                             |
| MAF 8.1                                      | $\Delta rlmA$ ; <i>PagsA::mluc</i> ; $\DeltaakuB$           | This study                             |

**References**

- da Silva Ferreira, M.E., Kress, M.R., Savoldi, M., Goldman, M.H., Hartl, A., Heinekamp, T., *et al.*, (2006) The *akuB*(KU80) mutant deficient for nonhomologous end joining is a powerful tool for analyzing pathogenicity in *Aspergillus fumigatus*. *Eukaryot Cell* **5**: 207-211.
- Rocha, M.C., Godoy, K.F., de Castro, P.A., Hori, J.I., Bom, V.L., Brown, N.A., *et al.*, (2015) The *Aspergillus fumigatus* *pkcA*<sup>G579R</sup> Mutant Is Defective in the Activation of the Cell Wall Integrity Pathway but Is Dispensable for Virulence in a Neutropenic Mouse Infection Model. *PLoS One* **10**: e0135195.
- Valiante, V., Jain, R., Heinekamp, T. and Brakhage, A.A., (2009) The MpkA MAP kinase module regulates cell wall integrity signaling and pyomelanin formation in *Aspergillus fumigatus*. *Fungal Genet Biol* **46**: 909-918.
