# Supplementary material for: Aspergillus fumigatus MADS-Box Transcription Factor rlmA Is Required for Regulation of the Cell Wall Integrity and Virulence
Source: PubMed Central journal article supplement (PMC5015955; doi:10.1534/g3.116.031112), 2016-07-28
Supplement: supp_g3.116.031112_TableS2.pdf [file supp_g3.116.031112_TableS2.pdf]

**Supplemental Table 2:** Primers used in this study for construction of mutant strains.

| Primer name*             | Sequence                                                                |
|--------------------------|-------------------------------------------------------------------------|
| Afu3g08520 5F            | 5'-gtaacgccagggtttcccagtcacgacgCTTGCTTGCTTGCTTGCTT-3'                   |
| Afu3g08520 5R            | 5'- <u>gcatcagtgccctcctctcagacagaattcc</u> GCAGTAAACAAGGAACACCACG-3'    |
| pyrG FW                  | 5'-GGAATTCTGTCTGAGAGGAGGC-3'                                            |
| pyrG REV                 | 5'-GATATCGAATTCGCCTCAAAC-3'                                             |
| Afu3g0852 3F             | 5'- <u>aagagcattgtttgaggcgaattcgatc</u> ACTTTCTTGAATATTGCGATGG-3'       |
| Afu3g0852 3R             | 5'-gCGgataacaatttcacacaggaacagcTCAGCGTCCGGTAAGTTG-3'                    |
| rlmA 1000 FW             | 5'-CGTGTGGTTGCCAGCCTTGACCAGG-3'                                         |
| rlmA 1000 REV            | 5'-TCGTCTACCAGAACGACCTCGCGCG-3'                                         |
| rlmA ST SC 5F            | 5' – gtaacgccagggtttcccagtcacgacgATGGGTGAAGAAAGATCGA-3'                 |
| rlmA ORF REV             | 5'- <u>agttctctcctttactcattccccgtgttc</u> CGTCTTGGATTTCTTCGCC-3'        |
| rlmA 600 ups             | 5'-GAATGAGAAGAAAGGAGGAATGA-3'                                           |
| Spacer GFP FW            | 5'- <b>GGAACACGGGGA</b> ATGAGTAAAGGAGAAGAAGAACTTTTCA-3'                 |
| GFP REV pyrG             | <b>5'-GCATCAGTGCCTCCTCTCAGACAGAATTCC</b> TTATTTGTATAGTTCATCCATGCCATG-3' |
| MpkA_5'_For <sup>§</sup> | 5'-CTCATTCTTGTCTGATGCG-3'                                               |
| MpkA_3'_Rev <sup>§</sup> | 5'-GACTGTGCGAGAAATCCGCTT-3'                                             |
| mpkA 600 ups             | 5'-GAGCCCTGACTTCACTGCA-3'                                               |
| cpkA FW <sup>¶</sup>     | 5'-TACAACATACCTGGCTGGATG-3'                                             |

Small letters indicate homology to the pRS426 flanking sequence

Small underlined letters indicate homology to a fragment in the cassette

Bold letters indicate the Gly-Thr-Arg-Gly linker separating *rlmA* C-terminus and GFP start codon.

\* For primers location refer to Figure S1.

§ Sequence from Valiante *et al.*, 2009

¶ Sequence from Rocha *et al.*, 2015

## References

- Rocha, M.C., Godoy, K.F., de Castro, P.A., Hori, J.I., Bom, V.L., Brown, N.A., *et al.*, (2015) The *Aspergillus fumigatus* *pkcAG579R* Mutant Is Defective in the Activation of the Cell Wall Integrity Pathway but Is Dispensable for Virulence in a Neutropenic Mouse Infection Model. *PLoS One* **10**: e0135195.
- Valiante, V., Jain, R., Heinekamp, T. and Brakhage, A.A., (2009) The MpkA MAP kinase module regulates cell wall integrity signaling and pyomelanin formation in *Aspergillus fumigatus*. *Fungal Genet Biol* **46**: 909-918.
