# Supplementary material for: Aspergillus fumigatus MADS-Box Transcription Factor rlmA Is Required for Regulation of the Cell Wall Integrity and Virulence
Source: PubMed Central journal article supplement (PMC5015955; doi:10.1534/g3.116.031112), 2016-07-28
Supplement: supp_g3.116.031112_TableS3.pdf [file supp_g3.116.031112_TableS3.pdf]

**Supplemental Table 3: Real-time PCR primers used in this study**

| <b>Gene</b> | <b>Systematic name</b> | <b>Primer name</b>            | <b>Sequence</b>                                            |
|-------------|------------------------|-------------------------------|------------------------------------------------------------|
| <i>pkcA</i> | Afu5g11970             | pkcA 2663 FW<br>pkcA 2783 REV | 5'-CCGAAGTTCTGTTGGCTCTC-3'<br>5'-CAGAGACCGTAATCGGCAAT-3'   |
| <i>mpkA</i> | Afu4g13720             | mpkA FW<br>mpkA REV           | 5'-GGCCATCAAGAAGGTTACCA-3'<br>5'-TGAAATTGTCTGGTCTGTTGGA-3' |
| <i>rlmA</i> | Afu3g08520             | rlmA FW<br>rlmA REV           | 5'-GACGCCGATCTCTGCTCTAC-3'<br>5'-GGAGTGGGGAAGGTTAGAGG-3'   |
| <i>fskA</i> | Afu6g12400             | fskA FW<br>fskA REV           | 5'-AAGCAATCGAAGCTCAGGAA-3'<br>5'-ACCAATCCCATAGAGCGAAC-3'   |
| <i>agsA</i> | Afu3g00910             | agsA FW<br>agsA REV           | 5'-CCAACACCTGGAAGATGACC-3'<br>5'-AACACCGACCGATAGAAGGA-3'   |
| <i>agsB</i> | Afu2g11270             | agsB FW<br>agsB REV           | 5'-TCAGGGATTGGGCTGTATGT-3'<br>5'-TAGCACTTGAGAAGCCAGCA-3'   |
| <i>agsC</i> | Afu1g15440             | agsC FW<br>agsC REV           | 5'-TGCAGACCCTGACAAGAGTG-3'<br>5'-GAACAAGGCAATCCAGAACC-3'   |
| <i>gelA</i> | Afu2g01170             | gelA FW<br>gelA REV           | 5'-CACTGGCTACGGTCTTCCTC-3'<br>5'-CATTGTTGCCGCTAATCTCC-3'   |
| <i>gelB</i> | Afu6g11390             | gelB FW<br>gelB REV           | 5'-CAGGAGGAGAACGACTACGG-3'<br>5'-AGGTCTGGGTTGTGTTGGAG-3'   |
| <i>gelC</i> | Afu2g12850             | gelC FW<br>gelC REV           | 5'-GAATGGTGCGGTGACAAGAC-3'<br>5'-TGTTGCAGCCGTATTCAGAG-3'   |
| <i>gel4</i> | Afu2g05340             | gel4 FW<br>gel4 REV           | 5'-CCTCTGGCCAATGTTGACAA-3'<br>5'-GGTGCGCAGCTGCTTCA-3'      |
| <i>chsA</i> | Afu2g01870             | chsA FW<br>chsA REV           | 5'-CTGGAGTGTGGCTGGTCTCT-3'<br>5'-GCGTGTGAAAGCAGTATGGA-3'   |
| <i>chsB</i> | Afu4g04180             | chsB FW<br>chsB REV           | 5'-GCTCTCCACTGTCGGTCTCT-3'<br>5'-GGTCGTTGTTGATGGTGTG-3'    |
| <i>chsC</i> | Afu5g00760             | chsC FW<br>chsC REV           | 5'-TTGCTGCGAGTTTGTATTCC-3'<br>5'-GCCAGTAGGATGCCAAAGAG-3'   |
| <i>chsD</i> | Afu1g12600             | chsD FW<br>chsD REV           | 5'-CAGAACACGATCCGAACAAC-3'<br>5'-GCTTCGCACCCAAGTAGAAC-3'   |
| <i>chsE</i> | Afu2g13440             | chsE FW<br>chsE REV           | 5'-TGGTGTTGTTGACTTGCTC-3'<br>5'-TCATCCATCCAACCATTTCC-3'    |
| <i>chsF</i> | Afu8g05630             | chsF FW<br>chsF REV           | 5'-AACCTGCTTCTTCTGGGTGA-3'<br>5'-GAGCACGAGTTCATGAGGT-3'    |
| <i>chsG</i> | Afu3g14420             | chsG FW<br>chsG REV           | 5'-AGGATGAGGGCAAAGAGGTT-3'<br>5'-AAGGCGTTGCTAAAGATCCA-3'   |
| <i>csmB</i> | Afu2g13430             | csmB FW<br>csmB REV           | 5'-ACAATACGCGGCGAATCC-3'<br>5'-GTTATCCCGACTGCCCAAAA-3'     |
| <i>sod1</i> | Afu5g09240             | sod1 FW<br>sod1 REV           | 5'-CAAGATCACCGGCACTGTCA-3'<br>5'-AGACGGTGGTGGGAGAGTTCT-3'  |
| <i>sod2</i> | Afu4g11580             | sod2 FW<br>sod2 REV           | 5'-GCTTCGGCTGCTCCAAGA-3'<br>5'-CCTTGCCGCGAGCAAAA-3'        |
| <i>cat2</i> | Afu8g01670             | cat2 FW<br>cat2 REV           | 5'-ACATTGCCGCGCTCAAG-3'<br>5'-GCGGTGGAGATGAAGCTTCT-3'      |
| <i>cat1</i> | Afu3g02270             | cat1 FW<br>cat1 REV           | 5'-TCGGCCCCTGCAGATTC-3'<br>5'-AGCGCCCCAACAGTCTTG-3'        |
| <i>yapA</i> | Afu6g09930             | yapA FW<br>yapA REV           | 5'-GGAAGCCCATCCCACAATT-3'<br>5'-TCTTTGGCGCTGCTGGTT-3'      |
| <i>tubA</i> | Afu1g10910             | tubA FW<br>tubA REV           | 5'-TTCCAACAACATCCAGACC-3'<br>5'-CGACGGAACATAGCAGTGAA-3'    |
